# Modulatory Interactions of Resting-State Brain Functional Connectivity

Xin Di, Bharat B. Biswal\*

Department of Biomedical Engineering, New Jersey Institute of Technology, University Heights, Newark, New Jersey, United States of America

## Abstract

The functional brain connectivity studies are generally based on the synchronization of the resting-state functional magnetic resonance imaging (fMRI) signals. Functional connectivity measures usually assume a stable relationship over time; however, accumulating studies have reported time-varying properties of strength and spatial distribution of functional connectivity. The present study explored the modulation of functional connectivity between two regions by a third region using the physiological interaction (PPI) technique. We first identified eight brain networks and two regions of interest (ROIs) representing each of the networks using a spatial independent component analysis. A voxel-wise analysis was conducted to identify regions that showed modulatory interactions (PPI) with the two ROIs of each network. Mostly, positive modulatory interactions were observed within regions involved in the same system. For example, the two regions of the dorsal attention network revealed modulatory interactions with the regions related to attention, while the two regions of the extrastriate network revealed modulatory interactions with the regions in the visual cortex. In contrast, the two regions of the default mode network (DMN) revealed negative modulatory interactions with the regions in the executive network, and vice versa, suggesting that the activities of one network may be associated with smaller within network connectivity of the competing network. These results validate the use of PPI analysis to study modulation of resting-state functional connectivity by a third region. The modulatory effects may provide a better understanding of complex brain functions.

**Citation:** Di X, Biswal BB (2013) Modulatory Interactions of Resting-State Brain Functional Connectivity. PLoS ONE 8(8): e71163. doi:10.1371/journal.pone.0071163

**Editor:** Qiyong Gong, West China Hospital of Sichuan University, China

**Received:** February 11, 2013; **Accepted:** July 2, 2013; **Published:** August 30, 2013

**Copyright:** © 2013 Di, Biswal. This is an open-access article distributed under the terms of the Creative Commons Attribution License, which permits unrestricted use, distribution, and reproduction in any medium, provided the original author and source are credited.

**Funding:** This study was funded by NIH grant 5R01AG032088 (to BB). The funders had no role in study design, data collection and analysis, decision to publish, or preparation of the manuscript.

**Competing Interests:** The authors have declared that no competing interests exist.

\* E-mail: bbiswal@yahoo.com

## Introduction

Large-scale functional brain connectivity studies have provided a better understanding of the human brain functions [1,2]. After the discovery that the motor regions exhibited highly synchronized functional magnetic resonance imaging (fMRI) signals without explicitly performing a motor task [3], large body of studies on functional connectivity are based upon the resting-state fMRI paradigm. The regions that are in the same functional system typically reveal high functional connectivity in the resting-state [4,5,6]; thus, different brain systems can be identified based on the functional connectivity and relative independence of different brain regions [7,8,9,10].

The functional connectivity measures are generally based upon the temporal correlation of the resting-state fMRI time series [11], which implicitly assumes a stable relationship over time. However, accumulating studies have shown the time-varying properties of functional connectivity [12,13,14,15,16] as well as variations in spatial distribution of the brain networks [17,18]. Many researchers have suggested that these dynamic changes in connectivity should also be systematically explored since such property may provide a better understanding of the brain functions in both resting-state and task dependent conditions [19,20,21,22,23]. In the present study, we investigated the modulation of functional connectivity between two regions by a third region to examine one possible mechanism of dynamic functional connectivity.

In general, functional connectivity is measured based on correlations between fMRI time series, and can be expressed as a linear regression model:

$$y = \beta_{ROI1} \cdot x_{ROI1} + \varepsilon$$

where  $x_{ROI1}$  represents the time series of a seed region,  $y$  represents the time series of a given voxel,  $\varepsilon$  represents the residual. The model parameter  $\beta_{ROI1}$  thus represents the relationship (functional connectivity) between the seed region and the given voxel. Friston and colleagues proposed to include two regions of interest (ROIs) and their interaction (also known as physiological interaction, PPI) in the regression model to examine the modulatory interaction effect [24]. Subsequently, the regression model can be expressed as the following:

$$y = \beta_{ROI1} \cdot x_{ROI1} + \beta_{ROI2} \cdot x_{ROI2} + \beta_{PPI} \cdot x_{ROI1} \cdot x_{ROI2} + \varepsilon$$

where  $x_{ROI1}$  and  $x_{ROI2}$  denote the time series of the two ROIs. The critical term of this model is the interaction  $x_{ROI1} \cdot x_{ROI2}$ . This model can be rewritten as the following:

$$y = \beta_{ROI1} \cdot x_{ROI1} + (\beta_{ROI2} + \beta_{PPI} \cdot x_{ROI1}) \cdot x_{ROI2} + \varepsilon$$

This illustrates that the relationship between the resultant time series  $y$  and the ROI2 time series  $x_{ROI2}$  is expressed as  $\beta_{ROI2} + \beta_{PPI} \cdot x_{ROI1}$ , which is a linear function of the ROI1 time series  $x_{ROI1}$ . If the interaction effect  $\beta_{PPI}$  is significant, it will imply that the relationship between the resultant region and the ROI2 depends on the activation of ROI1.

The interaction effect is calculated at the neuronal level by deconvolving the BOLD signals with a hemodynamic response function (HRF) [25]. And the PPI analysis is conducted in a voxel-wise basis to identify regions that showed modulatory interactions with the two preselected ROIs. As compared with other model based methods such as the dynamic causal modeling (DCM) [26,27], the exploratory nature of the PPI analysis is suitable in the current stage, because the modulation of functional connectivity is still largely unknown.

In the present study, we focused on the interaction effect of two main regions within the well-studied intrinsic networks [28], and explored regions that exhibited modulatory interactions with the two regions within them. We hypothesize that the modulatory interactions may be present even in the resting-state. The resultant regions may either serve as a modulator of the functional connectivity between the two regions within a network or be modulated by the functional connectivity of the two regions within a network. This study will provide insight into the complex relationships between three (or more) brain regions within or between different brain networks.

## Methods

### Subjects

The fMRI data set was derived from the Beijing\_Zang dataset of the 1000 Functional Connectomes Project ([http://fcon\\_1000.projects.nitrc.org/](http://fcon_1000.projects.nitrc.org/)) [8]. The dataset originally contained 198 subjects. 192 subjects remained after the removal of subjects due to large head motion. We used the data from the first 64 subjects (40 female/24 male) as a discovery dataset, and the data from the following 64 subjects (43 female/21 male) as a replication dataset. The two samples were analyzed using the same processing procedure, but the group level statistics were conducted independently to assess the reproducibility of the PPI analysis. The last 64 subjects were not used for the current study. The mean age of the subjects in the discovery sample was 21.1 years (range from 18 to 26 years), and the mean age of the subjects in the replication sample was 21.2 years (range from 18 to 26 years). All the subjects were right-handed.

### Scanning Parameters

The MRI data were acquired using a SIEMENS Trio 3-Tesla scanner from Beijing Normal University. 230 whole brain volumes were acquired in the resting-state for each subject using a TR of 2 s. During the resting-state scan, the subjects were instructed to close their eyes, not to fall asleep, and to avoid thinking about anything in particular. The resolution of the fMRI images was  $3.125 \times 3.125 \times 3$  mm with  $64 \times 64 \times 36$  voxels. The T1-weighted sagittal three-dimensional magnetization-prepared rapid gradient echo (MP-RAGE) sequence was acquired using the following parameters: 128 slices, TR = 2530 ms, TE = 3.39 ms, slice thickness = 1.33 mm, flip angle =  $7^\circ$ , inversion time = 1100 ms, FOV =  $256 \times 256$  mm<sup>2</sup>.

## Functional MRI Data Analysis

**Preprocessing.** The fMRI image preprocessing and PPI analysis were conducted using the SPM8 package (<http://www.fil.ion.ucl.ac.uk/spm/>) under the MATLAB 7.6 environment (<http://www.mathworks.com>). For each subject, the first two functional images were discarded, resulting in 228 images for each subject. The functional images were motion-corrected and coregistered to the individual subject's high resolution anatomical image. Next, the subject's anatomical images were normalized to the T1 template provided by the SPM package in the Montreal Neurological institute (MNI) space. Then, the normalization parameters were used to normalize all the functional images into the MNI space, and the functional images were resampled into  $3 \times 3 \times 3$  mm<sup>3</sup> voxels. Finally, all the functional images were smoothed using a Gaussian kernel with 8 mm full-width at half-maximum (FWHM).

**Spatial ICA.** Spatial independent component analysis (ICA) was conducted to define intrinsic networks and ROIs for PPI analysis using the Group ICA of fMRI Toolbox (GIFT; <http://icatb.sourceforge.net/>) [29]. Twenty components were extracted. The resulting component maps were visually inspected to identify the commonly used intrinsic networks: the DMN, dorsal attention, left and right executive, salience, auditory, primary visual, extrastriate visual, and motor networks [28].

### PPI Analysis

The PPI analysis was conducted using a voxel-wise statistics using the general linear model (GLM) framework in SPM8. By defining two ROIs, PPI analysis identified regions where the connectivity with one selected ROI was correlated with the increasing or decreasing activity of the second selected ROI. Specifically, for each of our PPI analysis, we defined two ROIs within each of the specific intrinsic network derived from the ICA analysis (see Table 1). Thus, the PPI analysis will find regions whose connectivity with one region is modulated based upon the activity of the other region in the same network. This analysis will shed insight into the dynamic change of connectivity of a given network.

To define ROIs, the  $z$  map of each intrinsic network from the ICA analysis was first thresholded at  $z > 2.3$ , and the coordinates of peak voxels within the brain structures of interest were obtained (see Table 1). For all the components except auditory and extrastriate visual networks, the coordinates represent the peak voxel of the corresponding cluster. The components that were labeled auditory and extrastriate networks extended far beyond the auditory or extrastriate networks, so we chose the peak voxels within the bilateral superior temporal gyrus to represent the auditory network, and we chose the peak voxels within the bilateral middle temporal gyrus as the extrastriate network. Networks that were comprised of only one main cluster were not included in the PPI analysis, e.g. the primary visual network.

A GLM was constructed for each subject to extract ROI time series for PPI analysis. The GLM contained one pseudo-condition with an onset at the middle of the scan. This dummy regressor was only used so that SPM model estimation procedure was properly conducted; however, this dummy regressor had no relationship with further data analyses. The model also included the first eigenvector of the time series from white matter (WM) and cerebrospinal fluid (CSF) masks and six regressors of rigid-body head motion parameters. An implicit high pass filter of 1/100 Hz was used. The subject-specific WM and CSF masks were derived from their own segmented WM and CSF images, with a threshold of 0.99 to make sure that GM voxels were excluded from the masks. When defining ROIs, the first eigenvector within an 8 mm

**Table 1.** Components and regions of interests defined by the spatial ICA analysis.

| Network                  | Component | Region                         | Abbr. | MNI Coordinates |     |    |
|--------------------------|-----------|--------------------------------|-------|-----------------|-----|----|
|                          |           |                                |       | x               | y   | z  |
| Default mode network     | 18        | Posterior cingulate gyrus      | PCC   | 3               | -52 | 26 |
|                          |           | Medial prefrontal cortex       | MPFC  | 3               | 58  | 6  |
| Left Executive network   | 2         | Left superior frontal gyrus    | LSFG  | -33             | 22  | 52 |
|                          |           | Left superior parietal lobule  | LSPL  | -50             | -51 | 50 |
| Right Executive network  | 17        | Right superior frontal gyrus   | RSFG  | 27              | 28  | 52 |
|                          |           | Right superior parietal lobule | RSPL  | 36              | -66 | 48 |
| Salience network         | 14        | Left inferior frontal gyrus    | LIFG  | -48             | 19  | -5 |
|                          |           | Right inferior frontal gyrus   | RIFG  | 48              | 16  | -5 |
| Dorsal attention network | 20        | Left inferior parietal lobule  | LIPL  | -45             | -42 | 56 |
|                          |           | Right inferior parietal lobule | RIPL  | 48              | -39 | 55 |
| Auditory network         | 4         | Left superior temporal gyrus   | LSTG  | -62             | -1  | 9  |
|                          |           | Right superior temporal gyrus  | RSTG  | 62              | -26 | 16 |
| Extrastriate network     | 9         | Left middle temporal gyrus     | LMTG  | -50             | -65 | 10 |
|                          |           | Right superior temporal gyrus  | RMTG  | 45              | -76 | 10 |
| Motor network            | 13        | Left precentral gyrus          | LPCG  | -48             | -7  | 54 |
|                          |           | Right precentral gyrus         | RPCG  | 45              | -13 | 54 |

doi:10.1371/journal.pone.0071163.t001

sphere of the ROI center was extracted after the removal of WM, CSF, head motion and low frequency effects.

The BOLD time series of the two ROIs within a network were first deconvolved with the canonical HRF in the SPM8 using a simple empirical Bayes procedure. Thus, the resulting time course represented an approximation of neural activity [25]. Next, the two neural time series were detrended and point multiplied (scalar product), so that the resulting time series represented the interaction of neural activity between the two ROIs. Then that interaction time series was convolved with the HRF, resulting in an interaction variable at the hemodynamic level. The PPI terms were calculated for ROI pairs from each of the intrinsic networks, and separate PPI models were built for each of the subjects using the GLM framework. The GLM model contained two regressors representing the main effects of the two ROI time series, one regressor representing the PPI effect, two regressors representing WM and CSF signals, and six regressors representing head motion effects. An implicit high pass filter of 1/100 Hz was used.

For each PPI analysis of an intrinsic network, a 2nd-level one sample t-test was conducted to make group-level inference. Simple t contrast of 1 or -1 was defined to reveal positive or negative PPI effects, respectively. The resulting clusters were first height thresholded at  $p < 0.001$ , and the cluster-level false discovery rate (FDR) was corrected at  $p < 0.05$  based on random field theory (i.e. topological FDR) [30]. The group level analyses were conducted for the discovery and replication samples independently, and the similarities and differences between the two samples were examined.

Since the introduction of deconvolution of fMRI time series to calculate the PPI term by Gitelman et al. [25], no empirical studies have been conducted to estimate the impact of deconvolution on the PPI results, especially for the resting-state data. Thus, we calculated the PPI terms using raw fMRI time series for each of the PPI analysis and for each subject. The Pearson's coefficients of the two PPI terms from deconvolved and raw time series were calculated for each of the networks within the discovery and

replication samples to assess the similarities. In addition, voxel-wise PPI analysis was conducted for the DMN ROIs using the PPI terms calculated from the raw fMRI time series. Similar group level analyses using one sample t-test were conducted for both the discovery and replication samples.

## Results

### PPI Analysis

The PPI results for the discovery and replication samples are listed in Table 2 and 3, respectively. The resulting clusters that showed consistent effects across the two samples are highlighted in bold.

A majority of clusters exhibited negative modulatory interactions with the medial prefrontal cortex (MPFC) and the posterior cingulate gyrus (PCC) regions (green circles) of the DMN in both the discovery (Figure 1A) and replication (Figure 1B) samples. Clusters that showed consistent negative modulatory interactions for the two samples were located in the medial frontal gyrus (BA 6), the left inferior parietal lobule (BA 40), the cingulate cortex (BA 23/31), and the anterior portion of the bilateral middle frontal gyrus (BA 9/10/46). The right inferior parietal lobule [40], and the right middle frontal gyrus (BA6) clusters only showed negative modulatory interactions in the discovery sample. And the bilateral temporal lobule (BA 22/37/39), the bilateral parahippocampal gyrus (BA 36), and the anterior cingulate gyrus (BA 33) only showed negative modulatory interactions in the replication sample. In contrast, there was also one cluster that revealed a positive modulatory interaction with the MPFC and PCC regions in the discovery sample, which was located in the left caudate body. Although this cluster was not observed in the replication sample when using a cluster-level FDR correction at  $p < 0.05$ , we observed several small clusters in the caudate when we did not apply a cluster extent threshold.

Only negative modulatory interactions were observed for the left superior frontal gyrus (LSFG) and the left superior parietal

**Table 2.** PPI results of the discovery sample for each networks.

| Label                              | BA        | cluster p (FDR-cor) | Voxels     | Peak T       | Peak coordinates |             |           |
|------------------------------------|-----------|---------------------|------------|--------------|------------------|-------------|-----------|
|                                    |           |                     |            |              | x                | y           | z         |
| DMM                                |           |                     |            |              |                  |             |           |
| L. Caudate, Caudate Body           |           | 0.013               | 55         | 4.39         | -21              | 26          | 7         |
| <b>L. Medial Frontal Gyrus</b>     | <b>6</b>  | <b>&lt;0.001</b>    | <b>367</b> | <b>-6.04</b> | <b>-3</b>        | <b>47</b>   | <b>31</b> |
| <b>L. Inferior Parietal Lobule</b> | <b>40</b> | <b>&lt;0.001</b>    | <b>123</b> | <b>-4.94</b> | <b>-45</b>       | <b>-55</b>  | <b>49</b> |
| R. Inferior Parietal Lobule        | 40        | <0.001              | 183        | -4.73        | 54               | -49         | 49        |
| <b>L. Middle Frontal Gyrus</b>     | <b>10</b> | <b>&lt;0.001</b>    | <b>104</b> | <b>-4.73</b> | <b>-42</b>       | <b>44</b>   | <b>7</b>  |
| <b>L. Cingulate Gyrus</b>          | <b>31</b> | <b>0.045</b>        | <b>34</b>  | <b>-4.64</b> | <b>-6</b>        | <b>-37</b>  | <b>49</b> |
| <b>R. Superior Frontal Gyrus</b>   | <b>10</b> | <b>0.004</b>        | <b>66</b>  | <b>-4.54</b> | <b>36</b>        | <b>56</b>   | <b>7</b>  |
| R. Middle Frontal Gyrus            | 6         | 0.04                | 37         | -4.12        | 36               | 20          | 55        |
| L Executive                        |           |                     |            |              |                  |             |           |
| R. Superior Frontal Gyrus          | 6         | 0.042               | 45         | -4.31        | 12               | 44          | 49        |
| R Executive                        |           |                     |            |              |                  |             |           |
| R. Precuneus                       | 7         | 0.019               | 48         | 4.59         | 21               | -73         | 58        |
| <b>L. Superior Frontal Gyrus</b>   | <b>6</b>  | <b>&lt;0.001</b>    | <b>514</b> | <b>-4.98</b> | <b>-18</b>       | <b>26</b>   | <b>55</b> |
| <b>L. Angular Gyrus</b>            | <b>39</b> | <b>&lt;0.001</b>    | <b>169</b> | <b>-4.86</b> | <b>-48</b>       | <b>-58</b>  | <b>40</b> |
| Attention                          |           |                     |            |              |                  |             |           |
| <b>L. Inferior Parietal Lobule</b> | <b>40</b> | <b>0.021</b>        | <b>48</b>  | <b>4.77</b>  | <b>-39</b>       | <b>-49</b>  | <b>64</b> |
| R. Fusiform Gyrus                  | 37        | 0.008               | 69         | 4.3          | 48               | -55         | -11       |
| <b>R. Superior Parietal Lobule</b> | <b>7</b>  | <b>0.04</b>         | <b>36</b>  | <b>4.26</b>  | <b>21</b>        | <b>-61</b>  | <b>70</b> |
| Salience                           |           |                     |            |              |                  |             |           |
| n.s.                               |           |                     |            |              |                  |             |           |
| Auditory                           |           |                     |            |              |                  |             |           |
| n.s.                               |           |                     |            |              |                  |             |           |
| Extrastriate                       |           |                     |            |              |                  |             |           |
| R. Parahippocampal Gyrus           | 30        | 0.04                | 37         | 4.63         | 33               | -55         | 4         |
| L. Parahippocampal Gyrus           | 19        | 0.03                | 45         | 4.36         | -30              | -58         | 1         |
| <b>L. Cuneus</b>                   | <b>17</b> | <b>0.03</b>         | <b>53</b>  | <b>4.32</b>  | <b>-12</b>       | <b>-100</b> | <b>13</b> |
| Motor                              |           |                     |            |              |                  |             |           |
| L. Cingulate Gyrus                 | 24        | 0.001               | 109        | 5.1          | -6               | 14          | 28        |
| L. Precentral Gyrus                | 43        | <0.001              | 130        | 4.98         | -54              | -4          | 10        |
| R. Middle Frontal Gyrus            | 9         | 0.002               | 79         | 4.96         | 33               | 53          | 31        |
| R. Inferior Frontal Gyrus          | 9         | <0.001              | 226        | 4.91         | 63               | 8           | 19        |
| L. Insula                          | 13        | 0.001               | 89         | 4.75         | -33              | 14          | 13        |
| <b>L. Precuneus</b>                | <b>7</b>  | <b>0.02</b>         | <b>47</b>  | <b>4.36</b>  | <b>-3</b>        | <b>-55</b>  | <b>67</b> |

The clusters of negative modulation are shown as negative peak t values. The clusters are thresholded at  $p < 0.001$ , and cluster-level false discovery rate corrected at  $p < 0.05$ . BA, Brodmann's area; R, right; L, left; n.s., non-significant. The coordinates represents the coordinates in MNI spaces.  
doi:10.1371/journal.pone.0071163.t002

lobule (LSPL) regions of the left executive network (Figure 2). In the discovery sample, one cluster located in the right superior frontal gyrus (BA 6) revealed a negative modulatory interaction with the LSFG and LSPL seeds (Figure 2A). No clusters were observed in the replication sample when using a cluster-level FDR correction at  $p < 0.05$  (Figure 2B). However, we observed a small cluster within the superior frontal gyrus when a cluster extent threshold was not applied.

The clusters that revealed negative modulatory interactions with the right superior frontal gyrus (RSFG) and the right superior parietal lobule (RSPL) regions of the right executive network were generally similar between the discovery (Figure 3A) and replication (Figure 3B) samples, including regions from the superior frontal

gyrus to the medial frontal gyrus (BA 6/9), and a cluster in the temporal/parietal region (BA 39). In the discovery sample, there was also a cluster that revealed a positive modulatory interaction with the RSFG and RSPL regions, which was localized in the precuneus (BA 7). Similar clusters were not observed in the replication sample even when the cluster correction was not applied.

No suprathreshold clusters showed modulatory interaction effects with the left inferior frontal gyrus (LIFG) and the right inferior frontal gyrus (RIFG) regions of the salience network in both samples.

The clusters that showed modulatory interactions with the left inferior parietal lobule (LIPL) and the right inferior parietal lobule

**Table 3.** PPI results of the replication sample for each networks.

| Label                              | BA        | cluster p (FDR-cor) | Voxels     | Peak T       | Peak coordinates |            |           |
|------------------------------------|-----------|---------------------|------------|--------------|------------------|------------|-----------|
|                                    |           |                     |            |              | x                | y          | z         |
| DMN                                |           |                     |            |              |                  |            |           |
| <b>R. Middle Frontal Gyrus</b>     | <b>11</b> | <b>0.013</b>        | <b>52</b>  | <b>-5.14</b> | <b>33</b>        | <b>41</b>  | <b>-2</b> |
| <b>L. Cingulate Gyrus</b>          | <b>31</b> | <b>&lt;0.001</b>    | <b>188</b> | <b>-5.04</b> | <b>-9</b>        | <b>-25</b> | <b>37</b> |
| <b>L. Medial Frontal Gyrus</b>     | <b>9</b>  | <b>&lt;0.001</b>    | <b>144</b> | <b>-5.03</b> | <b>-6</b>        | <b>53</b>  | <b>25</b> |
| R. Sub-Gyral                       | 37        | 0.017               | 43         | -4.95        | 57               | -49        | -8        |
| R. Parahippocampal Gyrus           | 36        | 0.032               | 34         | -4.66        | 30               | -40        | -8        |
| <b>L. Middle Frontal Gyrus</b>     | <b>9</b>  | <b>0.005</b>        | <b>76</b>  | <b>-4.55</b> | <b>-42</b>       | <b>20</b>  | <b>22</b> |
| <b>L. Cingulate Gyrus</b>          | <b>23</b> | <b>0.014</b>        | <b>49</b>  | <b>-4.45</b> | <b>-3</b>        | <b>-10</b> | <b>31</b> |
| L. Anterior Cingulate              | 33        | 0.026               | 37         | -4.44        | -3               | 17         | 22        |
| <b>L. Inferior Parietal Lobule</b> | <b>40</b> | <b>0.008</b>        | <b>59</b>  | <b>-4.42</b> | <b>-45</b>       | <b>-52</b> | <b>61</b> |
| L. Middle Temporal Gyrus           | 22        | 0.005               | 71         | -4.42        | -57              | -37        | 1         |
| <b>R. Middle Frontal Gyrus</b>     | <b>46</b> | <b>0.014</b>        | <b>47</b>  | <b>-4.34</b> | <b>45</b>        | <b>32</b>  | <b>19</b> |
| <b>L. Inferior Frontal Gyrus</b>   | <b>47</b> | <b>0.04</b>         | <b>31</b>  | <b>-4.21</b> | <b>-45</b>       | <b>29</b>  | <b>-8</b> |
| L. Middle Temporal Gyrus           | 39        | 0.014               | 46         | -4.19        | -48              | -73        | 34        |
| L. Parahippocampal Gyrus           | 36        | 0.008               | 60         | -4.15        | -30              | -40        | -11       |
| L Executive                        |           |                     |            |              |                  |            |           |
| n.s.                               |           |                     |            |              |                  |            |           |
| R Executive                        |           |                     |            |              |                  |            |           |
| <b>L. Superior Frontal Gyrus</b>   | <b>6</b>  | <b>0.005</b>        | <b>81</b>  | <b>-5.91</b> | <b>-18</b>       | <b>32</b>  | <b>58</b> |
| <b>R. Superior Frontal Gyrus</b>   | <b>6</b>  | <b>0.005</b>        | <b>75</b>  | <b>-4.64</b> | <b>15</b>        | <b>44</b>  | <b>52</b> |
| <b>L. Medial Frontal Gyrus</b>     | <b>9</b>  | <b>0.005</b>        | <b>76</b>  | <b>-4.52</b> | <b>-9</b>        | <b>47</b>  | <b>13</b> |
| <b>L. Middle Temporal Gyrus</b>    | <b>39</b> | <b>0.028</b>        | <b>48</b>  | <b>-4.13</b> | <b>-48</b>       | <b>-76</b> | <b>34</b> |
| Attention                          |           |                     |            |              |                  |            |           |
| <b>R. Superior Parietal Lobule</b> | <b>7</b>  | <b>&lt;0.001</b>    | <b>556</b> | <b>5.13</b>  | <b>21</b>        | <b>-61</b> | <b>70</b> |
| R. Middle Frontal Gyrus            | 6         | 0.014               | 63         | 4.55         | 30               | -4         | 61        |
| L. Middle Frontal Gyrus            | 46        | 0.004               | 93         | -4.89        | -45              | 50         | 10        |
| R. Superior Frontal Gyrus          | 9         | 0.009               | 70         | -4.47        | 30               | 53         | 22        |
| R. Inferior Parietal Lobule        | 40        | 0.04                | 45         | -4.36        | 60               | -49        | 46        |
| Salience                           |           |                     |            |              |                  |            |           |
| n.s.                               |           |                     |            |              |                  |            |           |
| Auditory                           |           |                     |            |              |                  |            |           |
| L. Precentral Gyrus                | 6         | <0.001              | 242        | 6.08         | -54              | -1         | 22        |
| R. Precentral Gyrus                | 6         | <0.001              | 148        | 4.64         | 63               | -1         | 22        |
| Extrastriate                       |           |                     |            |              |                  |            |           |
| <b>L. Cuneus</b>                   | <b>18</b> | <b>0.001</b>        | <b>98</b>  | <b>4.87</b>  | <b>-3</b>        | <b>-79</b> | <b>22</b> |
| Motor                              |           |                     |            |              |                  |            |           |
| R. Cuneus                          | 18        | 0.041               | 43         | 4.5          | 18               | -82        | 25        |
| R. Lingual Gyrus                   | 18        | <0.001              | 123        | 4.43         | 30               | -82        | -2        |
| <b>L. Precuneus</b>                | <b>7</b>  | <b>0.043</b>        | <b>39</b>  | <b>4.32</b>  | <b>-9</b>        | <b>-58</b> | <b>70</b> |
| L. Cerebellum, Posterior Lobe      |           | 0.038               | 49         | 3.86         | -18              | -64        | -17       |
| R. Caudate, Caudate Body           |           | 0.035               | 50         | -5.06        | 15               | 5          | 19        |
| L. Posterior Cingulate             | 23        | 0.035               | 51         | -4.92        | -6               | -25        | 22        |

The clusters of negative modulation are shown as negative peak t values. The clusters are thresholded at  $p < 0.001$ , and cluster-level false discovery rate corrected at  $p < 0.05$ . BA, Brodmann's area; R, right; L, left; n.s., non-significant. The coordinates represents the coordinates in MNI spaces.  
doi:10.1371/journal.pone.0071163.t003

(RIPL) regions of the dorsal attention network in the discovery (A) and replication (B) samples are illustrated in Figure 4. Common clusters that showed positive modulatory interactions in both the samples were located in the superior portion of the parietal lobule

(BA 7/40). In the discovery sample, a cluster that was located in the right fusiform gyrus (BA 37) also revealed a positive modulatory interaction with the LIPL and RIPL regions. This cluster was also observed in the replication sample when the

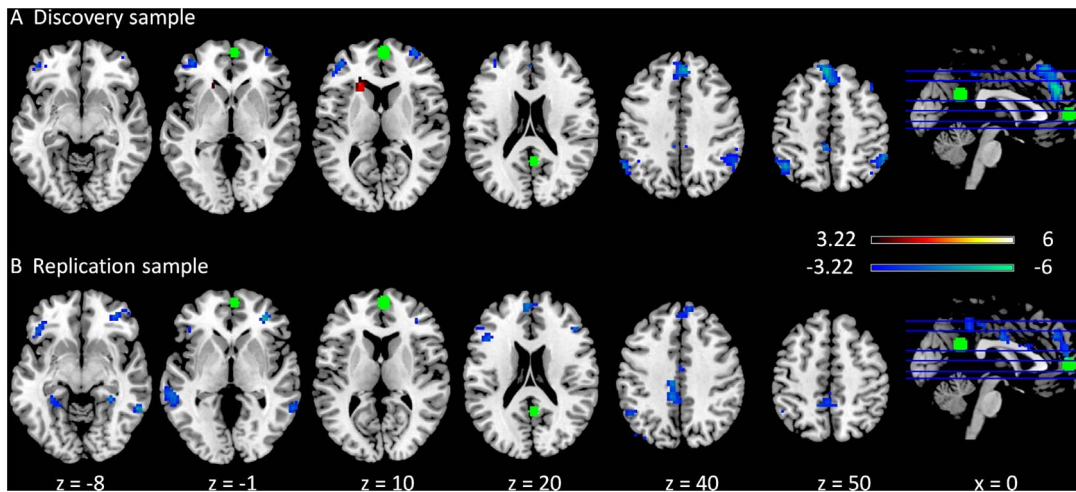

**Figure 1. Clusters correlated with positive (in hot) and negative (in cold) modulation effect of the functional connectivity between the two DMN ROIs in the discovery (A) and replication (B) samples.** The green circles represent the ROIs used in this PPI analysis. The maps were thresholded at  $p < 0.05$  FDR corrected with a height threshold of  $p < 0.001$ . The x and z values represent the coordinates in the MNI space. doi:10.1371/journal.pone.0071163.g001

cluster level correction was not applied. In the replication sample, a cluster located in the frontal eye field (BA6) also demonstrated a positive modularity interaction with the LIPL and RIPL regions. In addition, in the replication sample, three clusters also showed negative modulatory interactions with the LIPL and RIPL regions, which were located in the frontal pole regions (BA 9/46), and the inferior parietal lobule (BA 40).

No clusters revealed positive or negative modulatory interactions with the left superior temporal gyrus (LSTG) and the right superior temporal gyrus (RSTG) regions of the auditory network in the discovery sample (Figure 5A). While in the replication sample, two clusters located in the bilateral precentral gyrus (BA 6) revealed positive modulatory interactions with the LSTG and RSTG regions. These two clusters were also observed in the discovery sample when we did not apply a cluster level threshold.

Regions in the cuneus (BA 17/18) revealed consistent positive modulatory interactions with the left middle temporal gyrus (LMTG) and the right middle temporal gyrus (RMTG) regions of extrastriate network in both the discovery (Figure 6A) and the replication (Figure 6B) samples. In addition, two clusters located in the bilateral parahippocampal gyrus (BA 19/30) also revealed positive modulatory interactions with the LMTG and RMTG

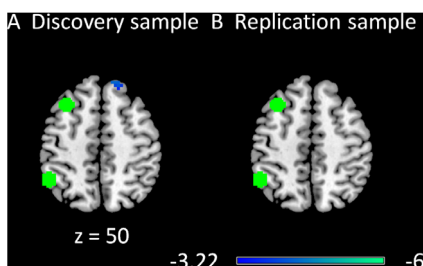

**Figure 2. Clusters correlated with positive (in hot) and negative (in cold) modulation effect of the functional connectivity between the two left executive network ROIs in the discovery (A) and replication (B) samples.** The green circles represent the ROIs used in this PPI analysis. The maps were thresholded at  $p < 0.05$  FDR corrected with a height threshold of  $p < 0.001$ . The z values represent the coordinates in the MNI space. doi:10.1371/journal.pone.0071163.g002

seeds in the discovery sample. No clusters revealed negative modulatory interactions with the LMTG and RMTG regions.

The modulatory interactions with the left precentral gyrus (LPCG) and the right precentral gyrus (RPCG) regions of the motor network revealed different spatial patterns in the discovery (Figure 7A) and the replication (Figure 7B) samples. In the discovery sample, positive modulatory interactions were observed in the bilateral precentral gyrus/insula (BA 9/13/43), the cingulate gyrus (BA 24), the precuneus (BA 7) and the right middle frontal gyrus (BA 9). In the replication sample, positive modulatory interactions were observed in the occipital regions (BA 18), the posterior cerebellum, and the precuneus (BA 7). Only the precuneus region was found in both samples. In addition, the right caudate body and the posterior cingulate gyrus that

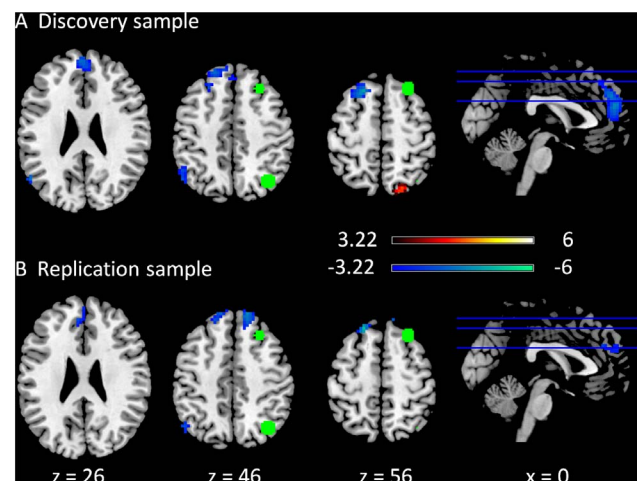

**Figure 3. Clusters correlated with positive (in hot) and negative (in cold) modulation effect of the functional connectivity between the two right executive network ROIs in the discovery (A) and replication (B) samples.** The green circles represent the ROIs used in this PPI analysis. The maps were thresholded at  $p < 0.05$  FDR corrected with a height threshold of  $p < 0.001$ . The x and z values represent the coordinates in the MNI space. doi:10.1371/journal.pone.0071163.g003

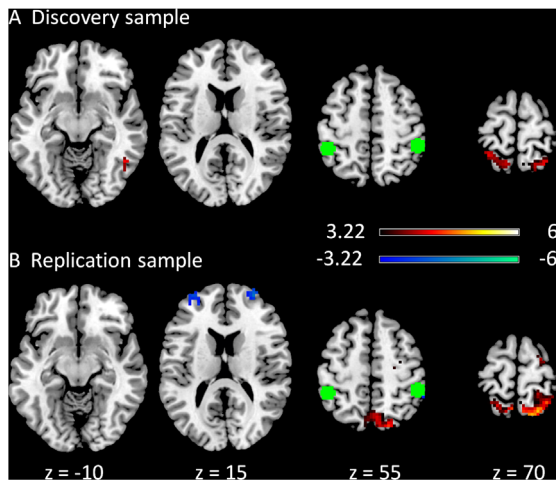

**Figure 4. Clusters correlated with positive (in hot) and negative (in cold) modulation effect of the functional connectivity between the two dorsal attention network ROIs in the discovery (A) and replication (B) samples.** The green circles represent the ROIs used in this PPI analysis. The maps were thresholded at  $p < 0.05$  FDR corrected with a height threshold of  $p < 0.001$ . The  $z$  values represent the coordinates in the MNI space. doi:10.1371/journal.pone.0071163.g004

extended to the thalamus exhibited negative modulatory interaction with the LPCG and RPCG regions in the replication sample.

### The Effects of Deconvolution

The correlations of the PPI terms using the deconvolved time series and the raw BOLD time series are demonstrated in Figure 8. In the discovery sample, the mean correlations ranged from 0.59 to 0.68 for the eight networks, and in the replication sample, the mean correlations ranged from 0.56 to 0.67. The correlations were fairly consistent across the eight networks (range within 0.1), however, the variance of mean correlations across networks showed a strong association between the two samples ( $r = 0.95$ ,  $p < 0.001$ ).

Figure 9 demonstrates negative modulatory interactions of the MPFC and PCC regions of the DMN calculated by both the deconvolved and the raw BOLD time series in both the discovery and replication samples, respectively. A glass brain was used to show the spatial distribution of the clusters. In general, the PPI results based on raw BOLD time series showed similar spatial patterns with smaller number of clusters and smaller clusters sizes (Figure 9B and 9D) when compared with the PPI results based on deconvolved time series (Figure 9A and 9C) in both the discovery and replication samples.

Figure 10 illustrates the positive modulatory interactions of the MPFC and PPC regions of the DMN calculated from both deconvolved and raw BOLD time series using a height threshold of  $p < 0.001$  without applying a cluster extent threshold. Small clusters within the caudate regions revealed positive modulatory effects with the DMN regions for the both PPI calculation methods in both samples. However, when a cluster level FDR correction threshold was applied, only the analyses for the discovery sample showed significant modulatory effects in the caudate regions (Figure 10A/10B).

### Discussion

By applying physiophysiological interaction analysis to the resting-state fMRI data, the current study identified regions that

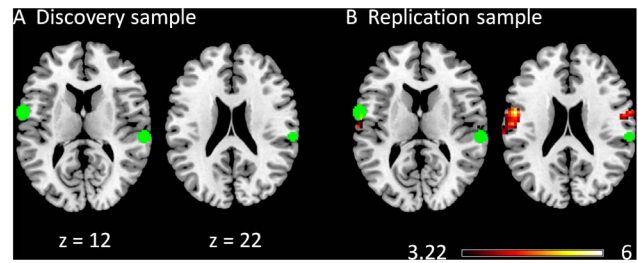

**Figure 5. Clusters correlated with positive (in hot) and negative (in cold) modulation effect of the functional connectivity between the two auditory network ROIs in the discovery (A) and replication (B) samples.** The green circles represent the ROIs used in this PPI analysis. The maps were thresholded at  $p < 0.05$  FDR corrected with a height threshold of  $p < 0.001$ . The  $z$  values represent the coordinates in the MNI space. doi:10.1371/journal.pone.0071163.g005

were associated with the modulatory interactions of the two regions that represented different brain networks. Seven out of the eight networks showed significant PPI effects in the discovery and/or replication samples. We observed that the ROI pairs in some of the networks such as the extrastriate network, the dorsal attention network, auditory network, and the motor network showed positive modulatory interactions with regions that were functionally related to those networks. In addition, regions in the competing networks, i.e., the DMN and executive network, demonstrated negative modulatory interactions.

### Explanation of PPI Effects

In addition to a simple correlation with one ROI, the PPI effect suggests a non-additive effect among the two ROIs and the resulting cluster. The connectivity from region A to C, and the connectivity from B to C do not satisfy the superposition principle, and implies a nonlinear relationship among those three regions. The nonlinear dynamics of brain connectivity are evident in the

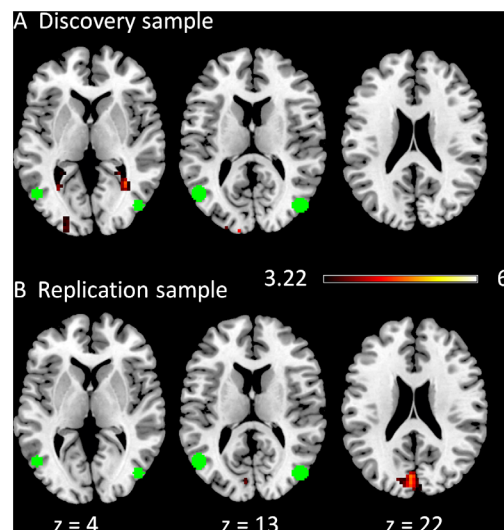

**Figure 6. Clusters correlated with positive (in hot) and negative (in cold) modulation effect of the functional connectivity between the two extrastriate network ROIs in the discovery (A) and replication (B) samples.** The green circles represent the ROIs used in this PPI analysis. The maps were thresholded at  $p < 0.05$  FDR corrected with a height threshold of  $p < 0.001$ . The  $z$  values represent the coordinates in the MNI space. doi:10.1371/journal.pone.0071163.g006

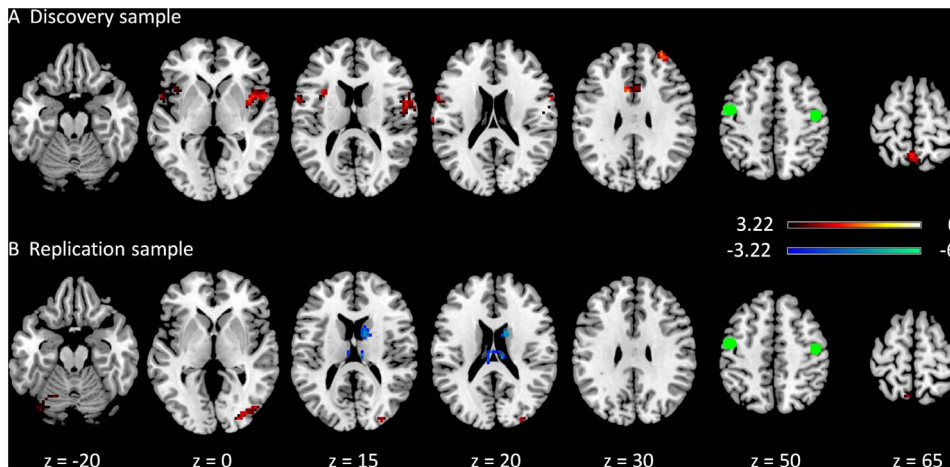

**Figure 7. Clusters correlated with positive (in hot) and negative (in cold) modulation effect of the functional connectivity between the two motor network ROIs in the discovery (A) and replication (B) samples.** The green circles represent the ROIs used in this PPI analysis. The maps were thresholded at  $p < 0.05$  FDR corrected with a height threshold of  $p < 0.001$ . The z values represent the coordinates in the MNI space. doi:10.1371/journal.pone.0071163.g007

resting-state when using electroencephalography (EEG) [31,32], and are shown to be critical in the emergence of low-frequency fluctuations of the fMRI signals using simulation data [23,33,34,35]. This nonlinear modulatory effect can be explained at the neuronal level by the mechanism of short-term synaptic plasticity (STP), which results in dynamic alterations of synaptic strengths on time scales of milliseconds to minutes [36]. Additionally, it can also be explained at the system level where the modulatory effect may serve as a control mechanism from one brain region to modulate information transmissions between two other regions, which may support attentional gating or switching processes [37,38].

Given that the analysis uses a correlation approach, the lack of direction in modulation effects is a shortcoming of the PPI results. Therefore, the modulation effect may be due to either of the ROI regions that modulate the connectivity of the other ROI to the resultant region or vice versa. Such information can only be obtained by the existing literatures on neuroanatomy and effective connectivity analysis. Some sophisticated models such as DCM [26,27] and Granger causality analysis [39] has been shown to provide directional information regarding the modulation effects. These methods may be helpful in the future to study directed modulatory effects.

### PPI Effects of Specific Networks

Positive modulatory interactions were observed in the analyses of the extrastriate network and dorsal attention network. Specifically, the cuneus region showed positive modulatory interactions with the bilateral MTG of the extrastriate network, and the superior parietal lobule and the fusiform gyrus revealed positive modulatory interactions with the bilateral IPL regions of the dorsal attention network. Prior studies have reported that the middle temporal visual areas have reciprocal connections to other visual areas and dorsal parietal regions [40,41]. In addition, the connectivity between the primary visual area, middle temporal gyrus and parietal regions has been reported to be modulated by extrinsic tasks such as stimulus motion and attention [26,42,43,44]. However, these studies do not explain the neuronal origin of task modulations. Stephan and colleagues have demonstrated a nonlinear modulation of parietal lobe on the connectivity from V1 to V5 [27]. The present results reveal similar nonlinear modulations among regions in the visual and dorsal attention systems. Taken together, these results may suggest an important role of nonlinear modulation to support attentional gating which selectively processes information from lower to higher visual areas [45]. Interestingly, these modulation effects were present even at resting-state conditions where the subjects closed their eyes and

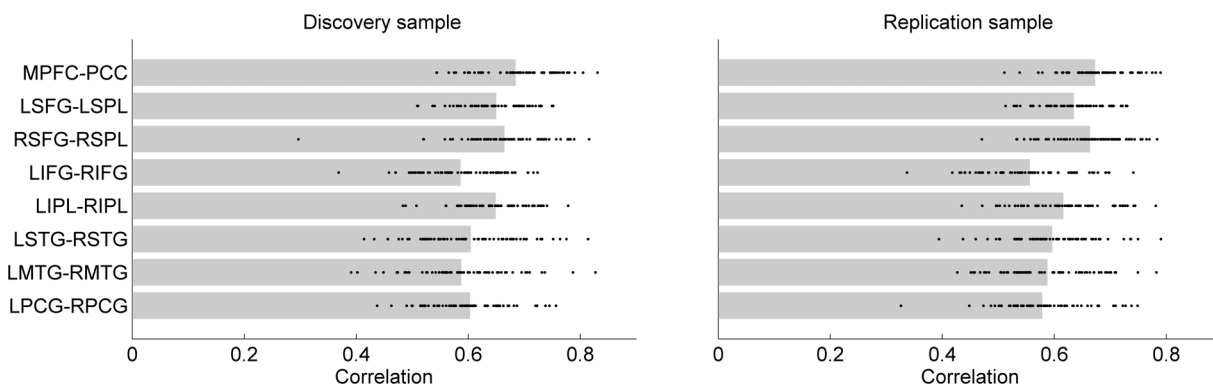

**Figure 8. Correlation of the PPI terms calculated using deconvolved versus nondeconvolved time series for each PPI analysis and sample.** The bars represent mean Pearson's correlation across subjects, and each dot represent a single subject. doi:10.1371/journal.pone.0071163.g008



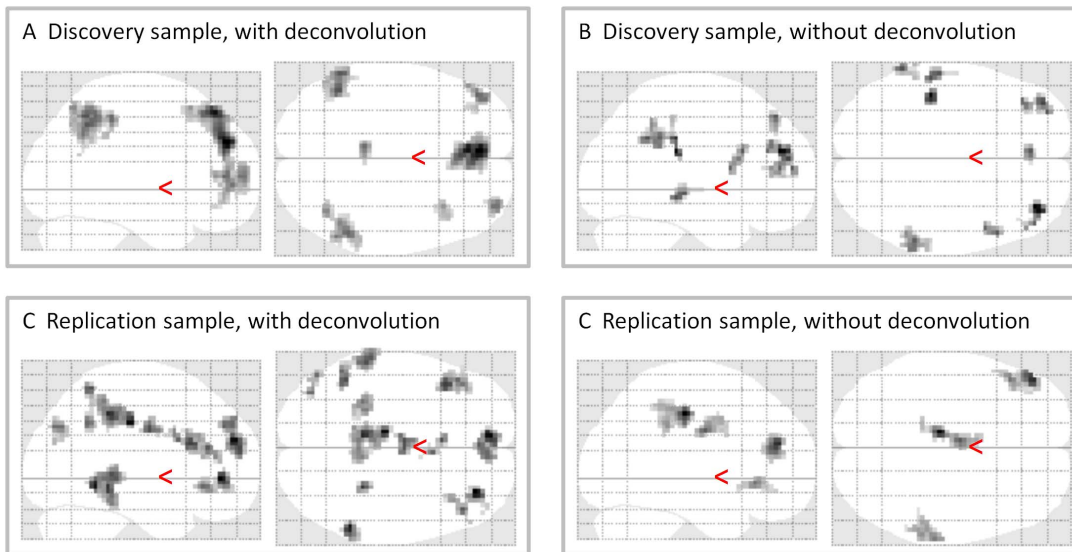

**Figure 9. Effects of PPI term calculation on voxel-wise PPI results in the discovery (A, B) and replication (C, D) samples.** Effects shown were negative PPI effects of the two DMN ROIs rendered on a glass brain. The maps were thresholded at  $p < 0.05$  FDR corrected with a height threshold of  $p < 0.001$ .

doi:10.1371/journal.pone.0071163.g009

were not involved in a specific task. Such observation may suggest that the nonlinear modulation may be intrinsic.

It is of particular interest to examine the modulation effects on the DMN regions, because these regions involve regions that are “active” during the resting-state [46]. An interesting observation is that the left caudate body showed positive modulatory interactions with the MPFC and PCC of the DMN. The caudate has been shown to receive intensive afferent projection from the cortex [47,48] and modulates the cortical activity through GABAergic (gamma aminobutyric acid) neurons [49]. In the human brain, widely distributed cortical regions have been shown to connect to the caudate via structural [50,51] and functional connectivity [52]. The amplitude of the local low frequency fluctuations within the caudate exhibited association with the connectivity between the caudate to wide spread cortical regions such as the DMN regions [53]. In addition, Granger causality analysis has shown that the DMN nodes, such as the MPFC and PCC, receive information from most of the brain regions which has been coined as the ‘driven hub’ of the brain [54,55]. Taken together, it is possible that the caudate regulates both the PCC and MPFC and may coordinate synchronous activities between these regions.

Negative modulatory interactions were mainly observed in the analysis of the DMN and executive networks. Interestingly, the clusters showing negative modulatory interactions in the DMN analysis were mainly located within the executive network, including the bilateral inferior parietal lobule, the bilateral middle/superior frontal gyrus, and the dorsal portion of the medial frontal gyrus (Figure 1). Conversely, the clusters showing negative PPI in left or right executive network analyses were mainly located within the DMN, such as the superior frontal gyrus, the anterior portion of the medial frontal gyrus, and the angular gyrus/middle temporal gyrus (Figure 2 and 3). Given the increasing consensus that the activities of the DMN and task positive networks are negatively correlated [56,57,58,59], the current results further reveal that regions in the DMN and executive networks showed negative nonlinear modulations. The negative PPI effects may suggest that the connectivity between the two nodes of a network is negatively modulated by the regions in the competing network. Alternatively, it is also possible that the connectivity between two regions from competing networks is negatively modulated by another region from the other network, suggesting increased anti-correlations. These nonlinear competing relationships are likely to be mediated by inhibitory neurotrans-

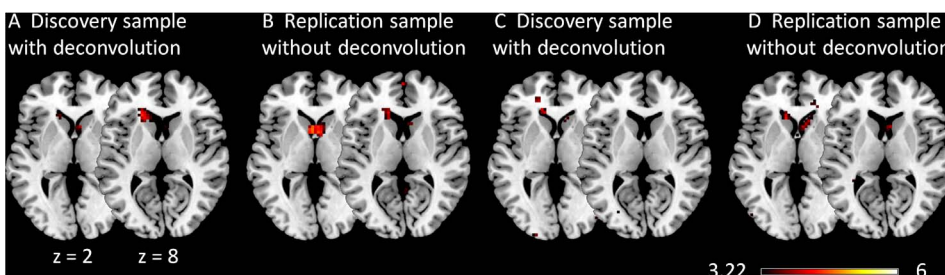

**Figure 10. Effects of PPI term calculation on voxel-wise PPI results in the discovery (A, B) and replication (C, D) samples.** Effects shown were positive PPI effects of the two DMN ROIs. The maps were thresholded at a height threshold of  $p < 0.001$  without correction of cluster size. The z values represent the coordinates in the MNI space.

doi:10.1371/journal.pone.0071163.g010

mitters such as GABA, given its critical role in forming anti-correlation neural systems [60,61,62].

Positive modulatory interactions were also observed in the PPI analyses of the motor network and the auditory network. These results suggest modulatory interactions among the motor areas, the insula/precentral gyrus, the superior temporal gyrus, and the prefrontal regions. However, these results are less consistent in the two samples compare with other networks. We believe that these modulatory interactions may be due to the functional relevance between these regions [63]. For example, modulation effects such as between the prefrontal cortex and motor areas have been shown in motor task execution [64]. However, further studies are needed to confirm these effects.

### Methodological Considerations

One technical consideration when using PPI is whether a deconvolution step should be implemented prior to the calculation of the PPI term. The deconvolution step was first introduced by Gitelman and colleagues [25], based on the rationale that the calculation of PPI terms using deconvolved “neuronal” time series was less likely to be affected by noises. In line with this notion, our result demonstrates that PPI analysis (in DMN) using the raw BOLD time series generally exhibited smaller cluster size and less number of clusters. These findings suggest that the deconvolution step may be necessary in the PPI analysis to minimize noises. In addition, the current analysis showed fairly consistent correlations between the PPI terms calculated from the deconvolved time series and the PPI terms calculated from the raw BOLD time series. These correlations are smaller than the correlation between psychophysiological interactions reported by Gitelman et al [25]. The reason may be that the calculation of physiophysiological interaction requires deconvolution of two BOLD time series, while the calculation of psychophysiological interaction only requires a deconvolution of one BOLD time series. An interesting observation is that the variability of correlations across different networks is fairly consistent between the discovery and replication samples ( $r = 0.95$ ), implying that the correlations between the PPI terms using deconvolved and raw time series may reflect the level of inherent noises in different networks.

### References

1. Bullmore E, Sporns O (2012) The economy of brain network organization. *Nat Rev Neurosci* 13(5): 336–49.
2. Menon V, Uddin LQ (2010) Saliency, switching, attention and control: a network model of insula function. *Brain Struct Funct* 214(5–6): 655–67.
3. Biswal B, Yetkin FZ, Haughton VM, Hyde JS (1995) Functional connectivity in the motor cortex of resting human brain using echo-planar MRI. *Magn Reson Med* 34(4): 537–41.
4. Cordes D, Haughton VM, Arfanakis K, Wendt GJ, Turski PA, et al. (2000) Mapping functionally related regions of brain with functional connectivity MR imaging. *AJNR Am J Neuroradiol* 21(9): 1636–44.
5. Greicius MD, Krasnow B, Reiss AL, Menon V (2003) Functional connectivity in the resting brain: a network analysis of the default mode hypothesis. *Proc Natl Acad Sci U S A* 100(1): 253–8.
6. Seeley WW, Menon V, Schatzberg AF, Keller J, Glover GH, et al. (2007) Dissociable intrinsic connectivity networks for salience processing and executive control. *J Neurosci* 27(9): 2349–56.
7. Beckmann CF, DeLuca M, Devlin JT, Smith SM (2005) Investigations into resting-state connectivity using independent component analysis. *Philos Trans R Soc Lond B Biol Sci* 360(1457): 1001–13.
8. Biswal BB, Mennes M, Zuo XN, Gohel S, Kelly C, et al. (2010) Toward discovery science of human brain function. *Proc Natl Acad Sci U S A* 107(10): 4734–9.
9. Golland Y, Golland P, Bentin S, Malach R (2008) Data-driven clustering reveals a fundamental subdivision of the human cortex into two global systems. *Neuropsychologia* 46(2): 540–53.
10. Yeo BT, Krienen FM, Sepulcre J, Sabuncu MR, Lashkari D, et al. (2011) The organization of the human cerebral cortex estimated by intrinsic functional connectivity. *J Neurophysiol* 106(3): 1125–65.

### Future Directions

The present study illustrates that network dynamics can be captured using the resting-state fMRI data. The modulatory interactions may be used to explain the variations in connectivity over time [12,13,14,15,16,17,18]. Given that the resting-state fMRI datasets are increasingly available [8,65], the method validated in the present study may provide a novel approach to systematically examine network dynamics in the large-scale brain system [66]. In addition, future studies of modulatory interactions may explain the individual [67], and group level differences in functional connectivity as well as yield insight regarding mental diseases [68]. Since the modulation of functional connectivity has been shown to vary across tasks [69], future studies are needed to investigate the similarities and differences in nonlinear dynamics between the resting-state and during specific task conditions. Secondly, since the current study preselected a total of 8 pairs of regions representing the eight brain networks which provides how regions within a network interact with other regions, examining the modulatory interactions of two regions from different networks may also provide valuable information. For example, Chang and Glover have shown that the task positive network such as the supplementary motor area, parietal cortex, and dorsolateral prefrontal cortex have higher variance in connectivity with the default mode regions [12]. How the relationships between the task positive network and DMN are modulated by other regions may provide important clues regarding the competing nature of the two networks [56].

### Acknowledgments

The authors wish to thank Drs Paul Taylor and Eun H. Kim for their helpful comments on an early version of this manuscript.

### Author Contributions

Conceived and designed the experiments: XD BB. Performed the experiments: XD BB. Analyzed the data: XD BB. Contributed reagents/materials/analysis tools: XD BB. Wrote the paper: XD BB.

11. Friston KJ (1994) Functional and effective connectivity in neuroimaging: A synthesis. *Hum Brain Mapping* 2: 56–78.
12. Chang C, Glover GH (2010) Time-frequency dynamics of resting-state brain connectivity measured with fMRI. *Neuroimage* 50(1): 81–98.
13. Kang J, Wang L, Yan C, Wang J, Liang X, et al. (2011) Characterizing dynamic functional connectivity in the resting brain using variable parameter regression and Kalman filtering approaches. *Neuroimage* 56(3): 1222–34.
14. Handwerker DA, Roopchansingh V, Gonzalez-Castillo J, Bandettini PA (2012) Periodic changes in fMRI connectivity. *Neuroimage* 15;63(3): 1712–9.
15. Allen EA, Damaraju E, Plis SM, Erhardt EB, Eichele T, et al. (2012) Tracking Whole-Brain Connectivity Dynamics in the Resting State. *Cereb Cortex*. doi: 10.1093/cercor/bhs352.
16. Chang C, Liu Z, Chen MC, Liu X, Duyn JH (2013) EEG correlates of time-varying BOLD functional connectivity. *Neuroimage* 72: 227–36.
17. Kiviniemi V, Vire T, Remes J, Elseoud AA, Starck T, et al. (2011) A Sliding Time-Window ICA Reveals Spatial Variability of the Default Mode Network in Time. *Brain Connectivity* 1(4): 339–347.
18. Smith SM, Miller KL, Moeller S, Xu J, Auerbach EJ, et al. (2012) Temporally-independent functional modes of spontaneous brain activity. *Proc Natl Acad Sci U S A* 109(3): 3131–6.
19. McIntosh AR (2000) Towards a network theory of cognition. *Neural Netw.* 2000 Oct-Nov;13(8–9): 861–70.
20. Stephan KE (2004) On the role of general system theory for functional neuroimaging. *J Anat.* 2004 Dec;205(6): 443–70.
21. Deco G, Jirsa VK, McIntosh AR (2011) Emerging concepts for the dynamical organization of resting-state activity in the brain. *Nat Rev Neurosci* 12(1): 43–56.
22. Deco G, Jirsa VK, McIntosh AR (2013) Resting brains never rest: computational insights into potential cognitive architectures. *Trends Neurosci* doi: 10.1016/j.tins.2013.03.001.

23. Friston KJ (1997) Transients, metastability, and neuronal dynamics. *Neuroimage* 2(2): 164–71.
24. Friston KJ, Buechel C, Fink GR, Morris J, Rolls E, et al. (1997) Psychophysiological and modulatory interactions in neuroimaging. *Neuroimage* 6(3): 218–29.
25. Gitelman DR, Penny WD, Ashburner J, Friston KJ (2003) Modeling regional and psychophysiological interactions in fMRI: the importance of hemodynamic deconvolution. *Neuroimage* 19(1): 200–7.
26. Friston KJ, Harrison L, Penny W (2003) Dynamic causal modelling. *Neuroimage* 19(4): 1273–302.
27. Stephan KE, Kasper L, Harrison LM, Daunizeau J, den Ouden HE, et al. (2008) Nonlinear dynamic causal models for fMRI. *Neuroimage* 42(2): 649–62.
28. Cole DM, Smith SM, Beckmann CF (2010) Advances and pitfalls in the analysis and interpretation of resting-state FMRI data. *Front Syst Neurosci* 4: 8.
29. Calhoun VD, Adali T, Pearlson GD, Pekar JJ (2001) A method for making group inferences from functional MRI data using independent component analysis. *Hum Brain Mapp* 14(3): 140–51.
30. Chumbley JR, Friston KJ (2009) False discovery rate revisited: FDR and topological inference using Gaussian random fields. *Neuroimage* 44(1): 62–70.
31. Rubinov M, Knock SA, Stam CJ, Micheloyannis S, Harris AW, et al. (2009) Small-world properties of nonlinear brain activity in schizophrenia. *Hum Brain Mapp* 30(2): 403–16.
32. Dimitriadis SI, Laskaris NA, Tsirka V, Vourkas M, Micheloyannis S (2012) An EEG study of brain connectivity dynamics at the resting state. *Nonlinear Dynamics Psychol Life Sci* 16(1): 5–22.
33. Deco G, Jirsa V, McIntosh AR, Sporns O, Kötter R (2009) Key role of coupling, delay, and noise in resting brain fluctuations. *Proc Natl Acad Sci U S A* 106(25): 10302–7.
34. Deco G, Jirsa VK (2012) Ongoing cortical activity at rest: criticality, multistability, and ghost attractors. *J Neurosci* 32(10): 3366–75.
35. Freyer F, Roberts JA, Becker R, Robinson PA, Ritter P, et al. (2011) Biophysical mechanisms of multistability in resting-state cortical rhythms. *J Neurosci* 31(17): 6353–61.
36. Zucker RS, Regehr WG (2002) Short-term synaptic plasticity. *Annu Rev Physiol* 64: 355–405.
37. den Ouden HE, Daunizeau J, Roiser J, Friston KJ, Stephan KE (2010) Striatal prediction error modulates cortical coupling. *J Neurosci* 30(9): 3210–9.
38. van Schouwenburg MR, den Ouden HE, Cools R (2010) The human basal ganglia modulate frontal-posterior connectivity during attention shifting. *J Neurosci* 30(29): 9910–8.
39. Goebel R, Roebroeck A, Kim DS, Formisano E (2003) Investigating directed cortical interactions in time-resolved fMRI data using vector autoregressive modeling and Granger causality mapping. *Magn Reson Imaging* 21(10): 1251–61.
40. Maunsell JH, van Essen DC (1983) The connections of the middle temporal visual area (MT) and their relationship to a cortical hierarchy in the macaque monkey. *J Neurosci* 3(12): 2563–86.
41. Gattass R, Nascimento-Silva S, Soares JG, Lima B, Jansen AK, et al. (2005) Cortical visual areas in monkeys: location, topography, connections, columns, plasticity and cortical dynamics. *Philos Trans R Soc Lond B Biol Sci* 360(1456): 709–31.
42. McIntosh AR, Grady CL, Ungerleider LG, Haxby JV, Rapoport SI, et al. (1994) Network analysis of cortical visual pathways mapped with PET. *J Neurosci* 14(2): 655–66.
43. McIntosh AR, Gonzalez-Lima F (1994) Structural Equation Modeling and Its Application to Network Analysis in Functional Brain Imaging. *Human Brain Mapping* 2: 2–22.
44. Büchel C, Friston KJ (1997) Modulation of connectivity in visual pathways by attention: cortical interactions evaluated with structural equation modelling and fMRI. *Cereb Cortex* 7(8): 768–78.
45. Reeves A, Sperling G (1986) Attention gating in short-term visual memory. *Psychol Rev* 93(2): 180–206.
46. Raichle ME, MacLeod AM, Snyder AZ, Powers WJ, Gusnard DA, et al. (2001) A default mode of brain function. *Proc Natl Acad Sci U S A* 98(2): 676–82.
47. Alexander GE, DeLong MR, Strick PL (1986) Parallel organization of functionally segregated circuits linking basal ganglia and cortex. *Annu Rev Neurosci* 9: 357–81.
48. Alexander GE, Crutcher MD (1990) Functional architecture of basal ganglia circuits: neural substrates of parallel processing. *Trends Neurosci* 13(7): 266–71.
49. Kolachana BS, Saunders RC, Weinberger DR (1997) In vivo characterization of extracellular GABA release in the caudate nucleus and prefrontal cortex of the rhesus monkey. *Synapse* 25(3): 285–92.
50. LeHéricy S, Ducros M, Van de Moortele PF, Francois C, Thivard L, et al. (2004) Diffusion tensor fiber tracking shows distinct corticostriatal circuits in humans. *Ann Neurol* 55(4): 522–9.
51. Leh SE, Pfito A, Chakravarty MM, Strafella AP (2007) Fronto-striatal connections in the human brain: a probabilistic diffusion tractography study. *Neurosci Lett* 419(2): 113–8.
52. Di Martino A, Scheres A, Margulies DS, Kelly AM, Uddin LQ, et al. (2008) Functional connectivity of human striatum: a resting state FMRI study. *Cereb Cortex* 18(12): 2735–47.
53. Di X, Kim EH, Huang CC, Tsai SJ, Lin CP, et al. (2013) The influence of the amplitude of low-frequency fluctuations on resting-state functional connectivity. *Front Hum Neurosci* 7: 118.
54. Deshpande G, Santhanam P, Hu X (2011) Instantaneous and causal connectivity in resting state brain networks derived from functional MRI data. *Neuroimage* 54(2): 1043–52.
55. Yan C, He Y (2011) Driving and driven architectures of directed small-world human brain functional networks. *PLoS One* 6(8): e23460.
56. Fox MD, Snyder AZ, Vincent JL, Corbetta M, Van Essen DC, et al. (2005) The human brain is intrinsically organized into dynamic, anticorrelated functional networks. *Proc Natl Acad Sci U S A* 102(27): 9673–8.
57. Fox MD, Zhang D, Snyder AZ, Raichle ME (2009) The global signal and observed anticorrelated resting state brain networks. *J Neurophysiol* 101(6): 3270–83.
58. Chai XJ, Castañón AN, Ongür D, Whitfield-Gabrieli S (2012) Anticorrelations in resting state networks without global signal regression. *Neuroimage* 59(2): 1420–8.
59. Keller CJ, Bickel S, Honey CJ, Groppe DM, Entz L, et al. (2013) Neurophysiological Investigation of Spontaneous Correlated and Anticorrelated Fluctuations of the BOLD Signal. *J Neurosci* 33(15): 6333–6342.
60. Northoff G, Walter M, Schulte RF, Beck J, Djydak U, et al. (2007) GABA concentrations in the human anterior cingulate cortex predict negative BOLD responses in fMRI. *Nat Neurosci* 10(12): 1515–7.
61. Anticevic A, Gancsos M, Murray JD, Repovs G, Driesen NR, et al. (2012) NMDA receptor function in large-scale anticorrelated neural systems with implications for cognition and schizophrenia. *Proc Natl Acad Sci U S A* 109(41): 16720–5.
62. Kapogiannis D, Reiter DA, Willette AA, Mattson MP (2012) Posteromedial cortex glutamate and GABA predict intrinsic functional connectivity of the default mode network. *Neuroimage* 64C: 112–119.
63. Cauda F, D'Agata F, Sacco K, Duca S, Geminiani G, et al. (2011) Functional connectivity of the insula in the resting brain. *Neuroimage* 55(1): 8–23.
64. Rao H, Di X, Chan RC, Ding Y, Ye B, et al. (2008) A regulation role of the prefrontal cortex in the fist-edge-palm task: evidence from functional connectivity analysis. *Neuroimage* 41(4): 1345–51.
65. Kelly C, Biswal BB, Craddock DR, Castellanos XF, Milham MP (2012) Characterizing variation in the functional connectome: promise and pitfalls. *Trends in Cognitive Sciences* 16(3): 181–8.
66. Bassett DS, Wymbs NF, Porter MA, Mucha PJ, Carlson JM, et al. (2011) Dynamic reconfiguration of human brain networks during learning. *Proc Natl Acad Sci U S A* 108(18): 7641–6.
67. Bluhm RL, Osuch EA, Lanius RA, Boksman K, Neufeld RW, et al. (2008) Default mode network connectivity: effects of age, sex, and analytic approach. *Neuroreport* 19(8): 887–91.
68. Dauvermann MR, Whalley HC, Romaniuk L, Valton V, Owens DG, et al. (2013) The application of nonlinear Dynamic Causal Modelling for fMRI in subjects at high genetic risk of schizophrenia. *Neuroimage* 73: 16–29.
69. Stamatakis EA, Marslen-Wilson WD, Tyler LK, Fletcher PC (2005) Cingulate control of fronto-temporal integration reflects linguistic demands: a three-way interaction in functional connectivity. *Neuroimage* 28(1): 115–21.
